# Supplementary material for: Global Analysis of Cell Wall Genes Revealed Putative Virulence Factors in the Dermatophyte Trichophyton rubrum
Source: PubMed Central journal article supplement (PMC6761320; doi:10.3389/fmicb.2019.02168), 2019-09-19
Supplement: Table_1.pdf [file Table_1.pdf]

**Supplementary Table S1.** Cell wall-related genes of *T. rubrum* modulated at various time points in response to exposures to acriflavine (ACF), undecanoic acid (UDA), or keratin.

| ID                                                                     | ACF vs. control |       |        | UDA vs. control |       | Keratin vs. control |       |       | Gene Product Name                                                        |
|------------------------------------------------------------------------|-----------------|-------|--------|-----------------|-------|---------------------|-------|-------|--------------------------------------------------------------------------|
|                                                                        | 3 h             | 12 h  | 24 h   | 3 h             | 12 h  | 24 h                | 48 h  | 96 h  |                                                                          |
| <b>Genes modulated in response to exposure of ACF, UDA and keratin</b> |                 |       |        |                 |       |                     |       |       |                                                                          |
| TERG_02517                                                             | -3.70           | -5.45 | -12.32 | -               | -2.41 | -                   | 1.72  | -     | N-acetyltransferase, GNAT family, putative ( <i>A. benhamiae</i> )       |
| TERG_04234                                                             | -               | 1.79  | 2.24   | -5.14           | -1.93 | 4.10                | 3.49  | 3.30  | hydrophobin, putative ( <i>T. verrucosum</i> )                           |
| TERG_05545                                                             | -2.86           | -4.39 | -10.50 | -2.82           | -1.75 | -                   | -     | -1.74 | GNAT family acetyltransferase, putative ( <i>A. benhamiae</i> )          |
| TERG_05625                                                             | -2.09           | -1.97 | -2.15  | -2.35           | -2.57 | 3.95                | -     | 2.44  | class V chitinase, putative ( <i>T. verrucosum</i> )                     |
| TERG_07408                                                             | -2.51           | -3.14 | -3.38  | -1.98           | -1.63 | -2.62               | -2.32 | -2.98 | acetyltransferase, GNAT family ( <i>A. benhamiae</i> )                   |
| <b>Genes modulated only in response to exposure of ACF and UDA</b>     |                 |       |        |                 |       |                     |       |       |                                                                          |
| TERG_01252                                                             | 1.70            | 2.45  | 2.80   | -               | 2.37  |                     |       |       | catalase A                                                               |
| TERG_03896                                                             | -               | 1.78  | -      | -               | 1.68  |                     |       |       | mannose-6-phosphate isomerase                                            |
| TERG_07456                                                             | 1.68            | -     | -      | -2.90           | -     |                     |       |       | cell wall protein PhiA ( <i>T. equinum</i> )                             |
| <b>Genes modulated only in response to exposure of ACF and keratin</b> |                 |       |        |                 |       |                     |       |       |                                                                          |
| TERG_01507                                                             | 2.37            | 2.29  | -      |                 |       | -                   | -     | 2.19  | extracellular proline-glycine rich protein ( <i>T. verrucosum</i> )      |
| TERG_08286                                                             | 1.90            | 1.96  | 2.60   |                 |       | -                   | -     | 2.38  | GPI anchored CFEM domain protein ( <i>T. verrucosum</i> )                |
| <b>Genes modulated only in response to exposure of UDA and keratin</b> |                 |       |        |                 |       |                     |       |       |                                                                          |
| TERG_00060                                                             |                 |       |        | -               | 1.72  | -                   | -     | 3.52  | GPI anchored cell wall protein, putative ( <i>A. benhamiae</i> )         |
| TERG_00216                                                             |                 |       |        | 2.88            | -     | 1.90                | -     | -     | endochitinase ( <i>T. equinum</i> )                                      |
| TERG_03624                                                             |                 |       |        | -2.88           | -     | 2.05                | 1.90  | 1.99  | SUN domain protein (Uth1), putative ( <i>T. verrucosum</i> )             |
| TERG_03963                                                             |                 |       |        | -               | -1.73 | 1.53                | 2.14  | 2.24  | mannosyl phosphorylinositol ceramide synthase SUR1 ( <i>T. equinum</i> ) |
| TERG_05576                                                             |                 |       |        | -1.75           | -     | -                   | 1.76  | 2.60  | cell wall glucanase (Scw11), putative ( <i>A. benhamiae</i> )            |
| TERG_05626                                                             |                 |       |        | -1.96           | -     | 2.25                | -     | 3.17  | chitinase ( <i>T. equinum</i> )                                          |
| TERG_08225                                                             |                 |       |        | -2.01           | -     | -                   | -     | 1.50  | hypothetical protein                                                     |
| TERG_08969                                                             |                 |       |        | -               | 2.46  | 2.03                | 1.82  | 1.66  | cytosolic Cu/Zn superoxide dismutase, putative ( <i>A. benhamiae</i> )   |
| <b>Genes modulated only in response to exposure of ACF</b>             |                 |       |        |                 |       |                     |       |       |                                                                          |
| TERG_00250                                                             | 1.62            | 1.78  | -      |                 |       |                     |       |       | <i>N</i> -acetylglucosamine-phosphate mutase ( <i>T. equinum</i> )       |
| TERG_00625                                                             | -               | -     | 1.59   |                 |       |                     |       |       | glycolipid anchored surface protein (GAS1) ( <i>T. equinum</i> )         |
| TERG_01127                                                             | -               | -     | 1.54   |                 |       |                     |       |       | 1,3-beta-glucan synthase component FKS1                                  |
| TERG_03618                                                             | 1.61            | -     | -      |                 |       |                     |       |       | class V chitinase, putative ( <i>T. verrucosum</i> )                     |
| TERG_06053                                                             | -               | 8.37  | -      |                 |       |                     |       |       | catalase ( <i>T. tonsurans</i> )                                         |
| TERG_07734                                                             | -2.47           | -4.04 | -3.93  |                 |       |                     |       |       | O-methyltransferase, putative ( <i>T. verrucosum</i> )                   |

**Genes modulated only in response to exposure of UDA**

|            |       |       |  |                                                                                 |
|------------|-------|-------|--|---------------------------------------------------------------------------------|
| TERG_00481 | -2.56 | -     |  | beta-glucosidase, putative ( <i>T. verrucosum</i> )                             |
| TERG_00707 | -1.82 | -     |  | GPI anchored serine-threonine rich protein ( <i>T. verrucosum</i> )             |
| TERG_01869 | -3.06 | -     |  | TOS1 ( <i>T. equinum</i> )                                                      |
| TERG_02350 | -     | -1.99 |  | endochitinase ( <i>T. equinum</i> )                                             |
| TERG_06016 | 1.81  | -     |  | glycosyl hydrolase ( <i>T. tonsurans</i> )                                      |
| TERG_06144 | -3.68 | -     |  | cell wall serine-threonine-rich galactomannoprotein Mp1 ( <i>A. benhamiae</i> ) |
| TERG_07269 | -1.75 | -     |  | mannose-1-phosphate guanyltransferase                                           |
| TERG_07641 | -1.60 | -     |  | GPI-anchored cell wall protein Pst1, putative ( <i>A. benhamiae</i> )           |
| TERG_11951 | -2.67 | -     |  | prp 6 CRoW domain-containing protein ( <i>M. canis</i> )                        |
| TERG_12281 | 1.95  | -     |  | glycosyl hydrolase ( <i>T. tonsurans</i> )                                      |
| TERG_12282 | 2.16  | -     |  | glycosyl hydrolase ( <i>T. tonsurans</i> )                                      |

**Genes modulated only in response to exposure of keratin**

|            |       |       |       |                                                                       |
|------------|-------|-------|-------|-----------------------------------------------------------------------|
| TERG_00218 | -     | -     | 2.59  | C2H2 transcription factor (Swi5), putative ( <i>A. benhamiae</i> )    |
| TERG_00342 | -1.98 | -1.56 | -     | phosphoglucomutase                                                    |
| TERG_00638 | 2.17  | 1.98  | 1.96  | cellobiose dehydrogenase, putative ( <i>A. benhamiae</i> )            |
| TERG_00693 | -     | -     | -1.70 | wiskott-Aldrich syndrome protein family member 2 ( <i>M. canis</i> )  |
| TERG_01464 | 1.71  | -     | -     | bifunctional catalase-peroxidase Cat2 ( <i>T. verrucosum</i> )        |
| TERG_01837 | 2.17  | 3.48  | 2.39  | glycosyl hydrolase ( <i>T. equinum</i> )                              |
| TERG_01917 | -     | -     | 3.30  | O-methyltransferase, putative ( <i>A. benhamiae</i> )                 |
| TERG_01967 | -     | -     | 2.87  | GPI anchored protein, putative ( <i>T. verrucosum</i> )               |
| TERG_02005 | -     | -     | 1.84  | catalase ( <i>T. tonsurans</i> )                                      |
| TERG_02705 | 2.77  | 3.69  | 2.74  | class III chitinase ( <i>T. tonsurans</i> )                           |
| TERG_02719 | 3.41  | 3.27  | 4.52  | glycosyl hydrolase ( <i>T. equinum</i> )                              |
| TERG_02742 | 2.28  | 2.41  | 1.89  | glycosyl hydrolase ( <i>T. tonsurans</i> )                            |
| TERG_02791 | -     | -3.01 | -3.35 | cell wall integrity signaling protein Lsp1/Pil1 ( <i>T. equinum</i> ) |
| TERG_02973 | -     | -     | 1.84  | morphogenesis protein (Msb1), putative ( <i>T. verrucosum</i> )       |
| TERG_03144 | -1.65 | -1.59 | -     | glucose-6-phosphate isomerase                                         |
| TERG_03223 | 6.07  | 6.58  | 5.95  | N-acetylglucosamine-6-phosphate deacetylase                           |
| TERG_03226 | 4.92  | 5.62  | 5.67  | glucosamine-6-phosphate deaminase                                     |
| TERG_03353 | -     | -     | -1.77 | endoglucanase ( <i>T. equinum</i> )                                   |
| TERG_03379 | -     | 1.53  | -     | AGC/NDR/NDR protein kinase                                            |
| TERG_03398 | -     | -     | -2.20 | chitinase ( <i>M. canis</i> )                                         |
| TERG_03489 | -     | -     | 3.05  | hypothetical protein                                                  |
| TERG_03620 | 2.91  | 2.40  | 2.08  | glycosyl transferase ( <i>T. tonsurans</i> )                          |
| TERG_03729 | 2.89  | 3.14  | 3.25  | 6-phosphogluconate dehydrogenase (decarboxylating)                    |
| TERG_03854 | -     | -     | -1.61 | laccase ( <i>T. tonsurans</i> )                                       |

|            |       |       |       |                                                                     |
|------------|-------|-------|-------|---------------------------------------------------------------------|
| TERG_04564 | 1.91  | 1.78  | -     | mixed-linked glucanase ( <i>T. equinum</i> )                        |
| TERG_04887 | 1.79  | 2.09  | 1.68  | endo-1,3-beta-glucanase ( <i>T. equinum</i> )                       |
| TERG_05002 | -1.85 | -1.57 | -     | UDP-glucose 4-epimerase GalE                                        |
| TERG_05530 | -     | -     | 2.14  | glycosyl hydrolase, putative ( <i>A. benhamiae</i> )                |
| TERG_05618 | -1.83 | -     | -     | Lcc2 ( <i>T. equinum</i> )                                          |
| TERG_05879 | -     | -1.54 | -1.60 | GPI mannosyltransferase ( <i>T. tonsurans</i> )                     |
| TERG_06242 | 5.67  | 5.84  | 6.73  | glucanase, putative ( <i>T. verrucosum</i> )                        |
| TERG_06397 | 2.07  | -     | 1.65  | alpha-1,2-mannosyltransferase ( <i>T. equinum</i> )                 |
| TERG_06638 | -     | 2.89  | 6.00  | endochitinase ( <i>T. equinum</i> )                                 |
| TERG_06749 | -1.62 | -     | -     | cell wall protein, putative ( <i>A. benhamiae</i> )                 |
| TERG_06925 | -     | -     | 1.59  | class V chitinase ( <i>T. tonsurans</i> )                           |
| TERG_06929 | 2.76  | 4.05  | 2.27  | chitinase ( <i>T. equinum</i> )                                     |
| TERG_06986 | 4.05  | 4.56  | 3.77  | exo-beta-1,3-glucanase, putative ( <i>A. benhamiae</i> )            |
| TERG_07406 | 3.89  | 4.12  | 3.74  | alpha-mannosidase ( <i>T. tonsurans</i> )                           |
| TERG_07597 | -     | 2.05  | 1.82  | SOK1 ( <i>T. equinum</i> )                                          |
| TERG_07657 | -     | -     | 1.91  | chitin synthase class VI ( <i>T. equinum</i> )                      |
| TERG_07662 | -     | -     | -2.08 | mannosylphosphate transferase ( <i>T. tonsurans</i> )               |
| TERG_07817 | -     | 2.33  | -     | endoglucanase ( <i>T. equinum</i> )                                 |
| TERG_07987 | -     | -     | -3.45 | GNAT family acetyltransferase ( <i>T. equinum</i> )                 |
| TERG_08058 | -     | 2.44  | 3.41  | alpha-1,2-mannosidase family protein ( <i>T. verrucosum</i> )       |
| TERG_08191 | -     | -1.58 | -1.67 | glucooligosaccharide oxidase ( <i>T. equinum</i> )                  |
| TERG_08211 | -2.62 | -     | -2.41 | acetyltransferase, GNAT family, putative ( <i>A. benhamiae</i> )    |
| TERG_08498 | -2.65 | -2.57 | -1.94 | triosephosphate isomerase                                           |
| TERG_08882 | -     | -     | 2.54  | C2H2 transcription factor (Crea), putative ( <i>T. verrucosum</i> ) |
| TERG_12107 | -2.45 | -1.99 | -1.61 | 1,4-alpha-glucan-branching enzyme                                   |
| TERG_12108 | -2.40 | -1.88 | -     | 1,4-alpha-glucan-branching enzyme                                   |
| TERG_12318 | -     | -     | 1.67  | chitin synthase ( <i>T. tonsurans</i> )                             |
| TERG_12319 | -     | -     | 1.68  | chitin synthase 2                                                   |

(-) not modulated at the time point
