# Supplementary material for: Global Analysis of Cell Wall Genes Revealed Putative Virulence Factors in the Dermatophyte Trichophyton rubrum
Source: PubMed Central journal article supplement (PMC6761320; doi:10.3389/fmicb.2019.02168), 2019-09-19
Supplement: Table_2.pdf [file Table_2.pdf]

**Supplementary Table S2.** List of primers used in qRT-PCR analysis.

| ID         | Gene Product Name                                                        | Primers (5' - 3')                                             | Efficiency (%) | Concentration (nM) |
|------------|--------------------------------------------------------------------------|---------------------------------------------------------------|----------------|--------------------|
| TERG_00216 | endochitinase ( <i>T. equinum</i> )                                      | FW: TCGACAACGGTCTAGGGAGGT<br>REV: CCTCGACGAAGGTAGCAATC        | 102.30         | 700                |
| TERG_00759 | conidiophore development protein <i>hym1</i> ( <i>T. violaceum</i> )     | FW: GCGTACGTGGACAGTGGTGAT<br>REV: GCGGTCGTCTCGAAGCA           | 105.94         | 400                |
| TERG_01127 | 1,3-beta-glucan synthase component FKS1                                  | FW: TTGACTGAGCGTGGTTTCTG<br>REV: GGCGTAGATCTGACACACGA         | 98.35          | 400                |
| TERG_01721 | STE/STE20/YSK protein kinase <i>kic1</i>                                 | FW: AGCGGGCAGGTCAAGCT<br>REV: TGGTCATTGTAGCGGAAAGTTG          | 102.20         | 400                |
| TERG_01788 | cell morphogenesis protein <i>tao3</i> ( <i>T. equinum</i> )             | FW: CCGGGTGGTAGACGAACCT<br>REV: CGTACTAACTGGGTGATTGGTTCTG     | 96.35          | 500                |
| TERG_02705 | class III chitinase ( <i>T. tonsurans</i> )                              | FW: CAAGGAGATGCTGGAAGGAG<br>REV: AGCCGAGGACGAAGTTGTTA         | 101.48         | 400                |
| TERG_02719 | glycosyl hydrolase ( <i>T. equinum</i> )                                 | FW: AGCCCTTCTTCCTCATCCTC<br>REV: GGTCCGGTAGAACTTGTCCTCA       | 103.95         | 300                |
| TERG_02863 | protein kinase activator <i>mob2</i> ( <i>T. equinum</i> )               | FW: CAGCCCCTCATCGATATCTACAC<br>REV: ACCGGCAAGGGCTTCAG         | 102.88         | 400                |
| TERG_03379 | AGC/NDR/NDR protein kinase <i>cbk1</i>                                   | FW: AAATTGTCAAGAAGGCCACCTGCG<br>REV: TGGAAGCTCGAAATGAGCGGTACA | 95.93          | 200                |
| TERG_03963 | mannosyl phosphorylinositol ceramide synthase SUR1 ( <i>T. equinum</i> ) | FW: AGCTGTACGACACAACGGAAT<br>REV: ATACAGCCATGAAAGGACTGC       | 105.40         | 200                |
| TERG_04234 | hydrophobin, putative ( <i>T. verrucosum</i> )                           | FW: GGCATACATCTTGGTGGTTTC<br>REV: CAGACAGTGGAGGTGGATGTT       | 95.09          | 400                |
| TERG_04564 | mixed-linked glucanase ( <i>T. equinum</i> )                             | FW: TCACTACGGAGTGCAAGACG<br>REV: TTGGCTCCTGGTAGACGTTT         | 96.76          | 300                |
| TERG_05576 | cell wall glucanase (Scw11), putative ( <i>A. benhamiae</i> )            | FW: CCCGACTCCAGGAACTTACA<br>REV: GAAGGACAGACGGTTGCACT         | 98.00          | 500                |
| TERG_07599 | cell morphogenesis protein Sog2 ( <i>T. tonsurans</i> )                  | FW: TCCTGGAAATCCTCGACCTAAG<br>REV: GCGGACTTCCTCAGGCAAT        | 101.34         | 400                |
| TERG_08191 | glucooligosaccharide oxidase ( <i>T. equinum</i> )                       | FW: CAGCTCAATGCTTTTGGAGAG<br>REV: TCTCCGTCTACCATGGACTGT       | 91.90          | 300                |
| TERG_12319 | chitin synthase 2 <i>chs</i>                                             | F: AGCCAACCTGCCTTGTACCAT<br>R: GTAATCCGACCCATCCCTTT           | 90.29          | 600                |
| TERG_04402 | glyceraldehyde 3-phosphate dehydrogenase                                 | FW: GCGTGACCCAGCCAACA<br>REV: CGGTGGACTCGACGATGTAGT           | 99.90          | 200                |
| TERG_05742 | DNA-dependent RNA polymerase II                                          | FW: TGCAGGAGCTGGTGGAGA<br>REV: GCTGGGAGGTACTGTTTGATCAA        | 94.99          | 300                |
