# Supplementary material for: Global Analysis of Cell Wall Genes Revealed Putative Virulence Factors in the Dermatophyte Trichophyton rubrum
Source: PubMed Central journal article supplement (PMC6761320; doi:10.3389/fmicb.2019.02168), 2019-09-19
Supplement: Table_3.pdf [file Table_3.pdf]

**Supplementary Table S3.** RNA-seq reads mapped to the *T. rubrum* reference genome.

| <b>Sample</b>        | <b>Raw reads</b> | <b>High-quality reads</b> | <b>Mapped reads STAR</b> | <b>Total mapped reads (%)</b> |
|----------------------|------------------|---------------------------|--------------------------|-------------------------------|
| Control 24 hours I   | 10,298,058       | 10,079,869                | 9,513,704                | 94.38                         |
| Control 24 hours II  | 11,730,284       | 11,470,387                | 9,274,834                | 80.86                         |
| Control 24 hours III | 13,134,053       | 12,870,769                | 12,130,966               | 94.25                         |
| Control 48 hours I   | 12,139,571       | 11,873,826                | 11,045,360               | 93.02                         |
| Control 48 hours II  | 8,484,471        | 8,220,328                 | 7,582,730                | 92.24                         |
| Control 48 hours III | 13,900,719       | 13,563,244                | 12,759,015               | 94.07                         |
| Control 96 hours I   | 10,846,570       | 10,620,463                | 9,913,587                | 93.34                         |
| Control 96 hours II  | 9,950,533        | 9,707,227                 | 9,214,841                | 94.93                         |
| Control 96 hours III | 12,788,333       | 12,287,043                | 11,533,469               | 93.87                         |
| Keratin 24 hours I   | 9,586,259        | 9,339,491                 | 7,040,104                | 75.38                         |
| Keratin 24 hours II  | 10,093,406       | 9,815,286                 | 8,266,023                | 84.22                         |
| Keratin 24 hours III | 13,910,853       | 13,576,336                | 11,848,476               | 87.27                         |
| Keratin 48 hours I   | 11,636,035       | 11,292,471                | 9,374,940                | 83.02                         |
| Keratin 48 hours II  | 9,081,225        | 8,769,772                 | 6,548,726                | 74.67                         |
| Keratin 48 hours III | 10,036,969       | 9,786,133                 | 8,751,212                | 89.42                         |
| Keratin 96 hours I   | 8,644,359        | 8,369,738                 | 6,533,731                | 78.06                         |
| Keratin 96 hours II  | 8,440,082        | 7,993,994                 | 6,216,676                | 77.77                         |
| Keratin 96 hours III | 12,753,703       | 12,436,022                | 9,652,577                | 77.62                         |
